# Supplementary material for: Multi-Omics Approach Reveals the Potential Core Vaccine Targets for the Emerging Foodborne Pathogen Campylobacter jejuni
Source: Front Microbiol. 2021 Jun 24;12:665858. doi: 10.3389/fmicb.2021.665858 (PMC8265506; doi:10.3389/fmicb.2021.665858)
Supplement: Supplementary file 1 [file Table_1.XLSX]

## Sheet: Sheet1
Genome statistics of completely squenced Campylobacter jejuni strains
Strain name	Size (Mb)	GC%	NCBI Genes	re-annotated ORFs*	NCBI Proteins	re-annotated proteins*	Length(bp)	Plasmids	BioSample	BioProject	Assembly	Assembly_version
NCTC 11168	1.64148	30.5	1668	1709	1572	1658	1641481	0	SAMEA1705929	PRJNA8	GCA_000009085.1	GCA000009085.1_ASM908v1
RM1221	1.77783	30.3	1903	1922	1774	1871	1777831	0	SAMN02604007	PRJNA303	GCA_000011865.1	GCA000011865.1_ASM1186v1
81-176	1.69905	30.4566	1771	1699	1658	1648	1699052	2	SAMN02604044	PRJNA16135	GCA_000015525.1	GCA000015525.1_ASM1552v1
269.97	1.84511	30.6	1972	2030	1726	1979	1845106	0	SAMN02604056	PRJNA17163	GCA_000017485.1	GCA000017485.1_ASM1748v1
81116; NCTC 11828	1.62811	30.5	1678	1774	1582	1727	1628115	0	SAMN02603008	PRJNA17953	GCA_000017905.1	GCA000017905.1_ASM1790v1
IA3902	1.67222	30.4955	1757	1899	1671	1847	1672219	1	SAMN02603425	PRJNA28907	GCA_000025425.1	GCA000025425.1_ASM2542v1
M1	1.61665	30.6	1678	1902	1550	1854	1616648	0	SAMN02603174	PRJNA38041	GCA_000148705.1	GCA000148705.1_ASM14870v1
1336	1.70283	30.5	1769	1796	1599	1753	1702833	0	SAMN02471182	PRJNA33777	GCA_000163975.1	GCA000163975.1_ASM16397v1
81-176_2	1.61617	30.6	-	1774	-	1723	1616175	0	SAMN02472139	PRJNA17341	GCA_000168755.1	GCA000168755.1_ASM16875v1
CG8421	1.63603	30.5	1724	1801	1588	1758	1636029	0	SAMN02470701	PRJNA21037	GCA_000171795.2	GCA000171795.2_ASM17179v2
ICDCCJ07001	1.70892	30.551	1669	1891	1531	1850	1708924	1	SAMN02603201	PRJNA47949	GCA_000184085.1	GCA000184085.1_ASM18408v1
S3	1.72459	30.4624	1840	1860	1720	1809	1724586	1	SAMN02603954	PRJNA45947	GCA_000184205.1	GCA000184205.1_ASM18420v1
PT14	1.6353	30.5	1699	1691	1617	1643	1635301	0	SAMN02604234	PRJNA168989	GCA_000302555.4	GCA000302555.4_ASM30255v4
NCTC 11168-BN148	1.64148	30.5	1716	1707	1633	1656	1641481	0	SAMEA2271917	PRJEB175	GCA_000304375.1	GCA000304375.1_AINO
32488	1.7024	30.5	1775	1794	1658	1743	1702398	0	SAMN02179883	PRJNA203445	GCA_000430385.1	GCA000430385.1_ASM43038v1
00-2538	1.71937	30.5	1818	1813	1731	1762	1719369	0	SAMN02603725	PRJNA213842	GCA_000466065.2	GCA000466065.2_ASM46606v2
00-2544	1.76643	30.4708	1876	1867	1781	1816	1766434	1	SAMN02603726	PRJNA214465	GCA_000466075.2	GCA000466075.2_ASM46607v2
00-2426	1.68081	30.5	1763	1759	1675	1708	1680813	0	SAMN02603724	PRJNA213841	GCA_000466105.2	GCA000466105.2_ASM46610v2
00-2425	1.71898	30.5	1814	1809	1731	1762	1718982	0	SAMN02603723	PRJNA211797	GCA_000468915.2	GCA000468915.2_ASM46891v2
4031	1.66933	30.5	1741	1731	1644	1680	1669329	0	SAMEA2272246	PRJEB4165	GCA_000493495.1	GCA000493495.1_TS
R14	1.79586	30.4	1943	2005	1759	1954	1795858	0	SAMN02743813	PRJNA189664	GCA_000632435.1	GCA000632435.1_ASM63243v1
MTVDSCj20	1.65174	30.5	1720	1709	1621	1658	1651739	0	SAMN02864993	PRJNA252963	GCA_000737085.1	GCA000737085.1_ASM73708v1
F38011	1.69194	30.5	1775	1882	1654	1831	1691939	0	SAMN02376799	PRJNA222831	GCA_000772225.1	GCA000772225.1_ASM77222v1
YH001	1.71236	30.5	1809	1872	1621	1821	1712361	0	SAMN03246887	PRJNA268925	GCA_000807355.1	GCA000807355.1_ASM80735v1
NCTC 11168-K12E5	1.64148	30.5	1715	1708	1633	1657	1641481	0	SAMN02316405	PRJNA215043	GCA_000830775.1	GCA000830775.1_ASM83077v1
NCTC 11168-Kf1	1.64148	30.5	1716	1709	1634	1658	1641480	0	SAMN02316408	PRJNA215043	GCA_000830805.1	GCA000830805.1_ASM83080v1
NCTC 11168-mcK12E5	1.64147	30.5	1718	1707	1636	1656	1641471	0	SAMN02316406	PRJNA215043	GCA_000830825.1	GCA000830825.1_ASM83082v1
NCTC 11168-mfK12E5	1.64147	30.5	1717	1711	1636	1660	1641469	0	SAMN02316407	PRJNA215043	GCA_000830845.1	GCA000830845.1_ASM83084v1
NCTC 11168-rNRC	1.64148	30.5	1718	1668	1635	1617	1641482	0	SAMN02316409	PRJNA215043	GCA_000830865.1	GCA000830865.1_ASM83086v1
00-1597	1.74205	30.4	1820	1826	1696	1775	1742047	0	SAMN03216760	PRJNA266759	GCA_000835285.1	GCA000835285.1_ASM83528v1
00-6200	1.67078	30.5	1753	1753	1662	1702	1670781	0	SAMN03216761	PRJNA266760	GCA_000835305.1	GCA000835305.1_ASM83530v1
01-1512	1.82784	30.3698	1975	1968	1878	1917	1827840	2	SAMN03216762	PRJNA266761	GCA_000835345.1	GCA000835345.1_ASM83534v1
00-0949	1.83101	30.37	1977	1973	1876	1922	1831013	2	SAMN03216759	PRJNA266757	GCA_000835365.1	GCA000835365.1_ASM83536v1
35925	1.61238	30.7	1660	1664	1547	1613	1612378	0	SAMN03344735	PRJNA275426	GCA_000934305.1	GCA000934305.1_ASM93430v1
RM3197	1.66457	30.6	1736	1738	1609	1686	1664565	0	SAMN03652757	PRJNA283557	GCA_001299565.1	GCA001299565.1_ASM129956v1
RM3196	1.66457	30.6	1734	1731	1611	1679	1664566	0	SAMN03652743	PRJNA283556	GCA_001299595.1	GCA001299595.1_ASM129959v1
RM1285	1.6358	30.5	1708	1742	1608	1690	1635803	0	SAMN04054191	PRJNA295067	GCA_001314285.1	GCA001314285.1_ASM131428v1
CJM1cam	1.61666	30.6	1676	1892	1566	1841	1616662	0	SAMN03838469	PRJNA288802	GCA_001412295.1	GCA001412295.1_ASM141229v1
T1-21	1.64871	30.5599	1752	1765	1628	1719	1648710	1	SAMN04221430	PRJNA300433	GCA_001432345.1	GCA001432345.1_ASM143234v1
NCTC11351	1.76644	30.2	1836	1865	1669	1814	1766442	0	SAMEA2479571	PRJEB6403	GCA_001457695.1	GCA001457695.1_NCTC11351
CJ677CC519	1.64279	30.3	1714	1826	1579	1783	1642794	0	SAMN03246034	PRJNA268846	GCA_001506185.1	GCA001506185.1_ASM150618v1
CJ677CC002	1.66977	30.3	1773	1748	1631	1705	1669766	0	SAMN03246003	PRJNA268846	GCA_001506205.1	GCA001506205.1_ASM150620v1
CJ677CC534	1.63383	30.4	1727	1770	1580	1727	1633831	0	SAMN03246049	PRJNA268846	GCA_001506225.1	GCA001506225.1_ASM150622v1
CJ677CC536	1.64228	30.3	1717	1763	1578	1720	1642281	0	SAMN03246051	PRJNA268846	GCA_001506245.1	GCA001506245.1_ASM150624v1
CJ677CC073	1.67255	30.3	1772	1756	1631	1713	1672553	0	SAMN03246026	PRJNA268846	GCA_001506265.1	GCA001506265.1_ASM150626v1
CJ677CC521	1.66843	30.3	1785	1762	1629	1719	1668425	0	SAMN03246036	PRJNA268846	GCA_001506285.1	GCA001506285.1_ASM150628v1
CJ677CC526	1.6676	30.3	1757	1765	1619	1722	1667602	0	SAMN03246041	PRJNA268846	GCA_001506305.1	GCA001506305.1_ASM150630v1
CJ677CC010	1.65386	30.3	1751	1768	1610	1725	1653863	0	SAMN03246005	PRJNA268846	GCA_001506325.1	GCA001506325.1_ASM150632v1
CJ677CC036	1.66518	30.3	1749	1769	1611	1726	1665175	0	SAMN03246015	PRJNA268846	GCA_001506345.1	GCA001506345.1_ASM150634v1
CJ677CC524	1.66833	30.7	1773	1762	1579	1719	1668335	0	SAMN03246039	PRJNA268846	GCA_001506365.1	GCA001506365.1_ASM150636v1
CJ677CC016	1.63764	30.4	1729	1792	1585	1749	1637642	0	SAMN03246009	PRJNA268846	GCA_001506385.1	GCA001506385.1_ASM150638v1
CJ677CC041	1.63613	30.4	1722	1770	1578	1727	1636128	0	SAMN03246018	PRJNA268846	GCA_001506405.1	GCA001506405.1_ASM150640v1
CJ677CC535	1.63369	30.4	1724	1766	1587	1723	1633693	0	SAMN03246050	PRJNA268846	GCA_001506425.1	GCA001506425.1_ASM150642v1
CJ677CC092	1.63272	30.4	1718	1760	1585	1717	1632718	0	SAMN03246030	PRJNA268846	GCA_001506445.1	GCA001506445.1_ASM150644v1
CJ677CC530	1.64928	30.3	1744	1814	1608	1771	1649284	0	SAMN03246045	PRJNA268846	GCA_001506465.1	GCA001506465.1_ASM150646v1
CJ677CC532	1.64304	30.3	1715	1800	1578	1757	1643038	0	SAMN03246047	PRJNA268846	GCA_001506485.1	GCA001506485.1_ASM150648v1
CJ677CC529	1.63127	30.4	1714	1785	1581	1742	1631266	0	SAMN03246044	PRJNA268846	GCA_001506505.1	GCA001506505.1_ASM150650v1
CJ677CC531	1.66605	30.3	1768	1759	1630	1716	1666051	0	SAMN03246046	PRJNA268846	GCA_001506525.1	GCA001506525.1_ASM150652v1
CJ677CC062	1.64498	30.3	1723	1771	1580	1728	1644975	0	SAMN03246024	PRJNA268846	GCA_001506545.1	GCA001506545.1_ASM150654v1
CJ677CC059	1.63251	30.4	1721	1768	1586	1725	1632509	0	SAMN03246022	PRJNA268846	GCA_001506565.1	GCA001506565.1_ASM150656v1
CJ677CC032	1.67599	30.3	1770	1766	1626	1723	1675989	0	SAMN03246012	PRJNA268846	GCA_001506585.1	GCA001506585.1_ASM150658v1
CJ677CC033	1.63411	30.4	1717	1779	1579	1736	1634109	0	SAMN03246013	PRJNA268846	GCA_001506605.1	GCA001506605.1_ASM150660v1
CJ677CC537	1.63315	30.4	1716	1829	1582	1786	1633145	0	SAMN03246052	PRJNA268846	GCA_001506625.1	GCA001506625.1_ASM150662v1
CJ677CC542	1.6336	30.4	1719	1673	1582	1622	1633596	0	SAMN03246057	PRJNA268846	GCA_001506645.1	GCA001506645.1_ASM150664v1
CJ677CC528	1.64519	30.3	1726	1755	1583	1712	1645188	0	SAMN03246043	PRJNA268846	GCA_001506665.1	GCA001506665.1_ASM150666v1
CJ677CC538	1.67595	30.3	1779	1785	1636	1744	1675952	0	SAMN03246053	PRJNA268846	GCA_001506685.1	GCA001506685.1_ASM150668v1
CJ677CC520	1.67976	30.2	1775	1828	1639	1785	1679764	0	SAMN03246035	PRJNA268846	GCA_001506705.1	GCA001506705.1_ASM150670v1
CJ677CC014	1.67123	30.3	1775	1776	1631	1733	1671231	0	SAMN03246008	PRJNA268846	GCA_001506725.1	GCA001506725.1_ASM150672v1
CJ677CC039	1.63563	30.4	1722	1754	1583	1711	1635627	0	SAMN03246016	PRJNA268846	GCA_001506745.1	GCA001506745.1_ASM150674v1
CJ677CC085	1.63638	30.4	1723	1765	1573	1722	1636377	0	SAMN03246028	PRJNA268846	GCA_001506765.1	GCA001506765.1_ASM150676v1
CJ677CC052	1.63521	30.4	1720	1760	1576	1717	1635207	0	SAMN03246020	PRJNA268846	GCA_001506785.1	GCA001506785.1_ASM150678v1
CJ677CC527	1.64394	30.3	1721	1773	1576	1730	1643938	0	SAMN03246042	PRJNA268846	GCA_001506805.1	GCA001506805.1_ASM150680v1
CJ677CC078	1.63137	30.4	1716	1774	1579	1731	1631373	0	SAMN03246027	PRJNA268846	GCA_001506825.1	GCA001506825.1_ASM150682v1
CJ677CC523	1.66722	30.3	1772	1803	1634	1760	1667224	0	SAMN03246038	PRJNA268846	GCA_001506845.1	GCA001506845.1_ASM150684v1
CJ677CC540	1.63649	30.4	1726	1762	1580	1719	1636490	0	SAMN03246055	PRJNA268846	GCA_001506865.1	GCA001506865.1_ASM150686v1
CJ677CC040	1.64065	30.3	1713	1772	1578	1729	1640646	0	SAMN03246017	PRJNA268846	GCA_001506885.1	GCA001506885.1_ASM150688v1
CJ677CC061	1.63513	30.4	1725	1771	1583	1728	1635130	0	SAMN03246023	PRJNA268846	GCA_001506905.1	GCA001506905.1_ASM150690v1
CJ677CC539	1.63622	30.4	1728	1773	1569	1730	1636223	0	SAMN03246054	PRJNA268846	GCA_001506925.1	GCA001506925.1_ASM150692v1
CJ677CC533	1.65705	30.4	1759	1772	1622	1729	1657054	0	SAMN03246048	PRJNA268846	GCA_001506945.1	GCA001506945.1_ASM150694v1
CJ677CC047	1.63524	30.4	1722	1772	1577	1729	1635237	0	SAMN03246019	PRJNA268846	GCA_001506965.1	GCA001506965.1_ASM150696v1
CJ677CC058	1.63261	30.4	1720	1764	1584	1721	1632612	0	SAMN03246021	PRJNA268846	GCA_001506985.1	GCA001506985.1_ASM150698v1
CJ677CC013	1.64269	30.3	1717	1821	1578	1778	1642694	0	SAMN03246007	PRJNA268846	GCA_001507005.1	GCA001507005.1_ASM150700v1
CJ677CC100	1.66915	30.3	1776	1764	1636	1721	1669148	0	SAMN03246033	PRJNA268846	GCA_001507025.1	GCA001507025.1_ASM150702v1
CJ677CC522	1.6425	30.3	1712	1807	1575	1764	1642497	0	SAMN03246037	PRJNA268846	GCA_001507045.1	GCA001507045.1_ASM150704v1
CJ677CC094	1.64112	30.3	1715	1756	1575	1713	1641119	0	SAMN03246031	PRJNA268846	GCA_001507065.1	GCA001507065.1_ASM150706v1
CJ677CC008	1.62454	30.4	1709	1804	1575	1761	1624545	0	SAMN03246004	PRJNA268846	GCA_001507085.1	GCA001507085.1_ASM150708v1
CJ677CC541	1.63419	30.4	1717	1766	1573	1723	1634189	0	SAMN03246056	PRJNA268846	GCA_001507105.1	GCA001507105.1_ASM150710v1
CJ677CC024	1.66157	30.3	1750	1774	1614	1731	1661567	0	SAMN03246010	PRJNA268846	GCA_001507125.1	GCA001507125.1_ASM150712v1
CJ677CC064	1.64516	30.3	1720	1819	1578	1776	1645157	0	SAMN03246025	PRJNA268846	GCA_001507145.1	GCA001507145.1_ASM150714v1
CJ677CC525	1.64204	30.3	1714	1799	1579	1756	1642039	0	SAMN03246040	PRJNA268846	GCA_001507165.1	GCA001507165.1_ASM150716v1
CJ677CC026	1.63571	30.4	1724	1823	1581	1780	1635709	0	SAMN03246011	PRJNA268846	GCA_001507185.1	GCA001507185.1_ASM150718v1
CJ677CC034	1.63721	30.4	1723	1796	1575	1753	1637207	0	SAMN03246014	PRJNA268846	GCA_001507205.1	GCA001507205.1_ASM150720v1
CJ677CC086	1.62979	30.4	1718	1762	1576	1719	1629790	0	SAMN03246029	PRJNA268846	GCA_001507225.1	GCA001507225.1_ASM150722v1
CJ677CC095	1.62891	30.4	1713	1814	1573	1771	1628907	0	SAMN03246032	PRJNA268846	GCA_001507245.1	GCA001507245.1_ASM150724v1
CJ677CC012	1.63395	30.4	1721	1763	1581	1720	1633951	0	SAMN03246006	PRJNA268846	GCA_001507265.1	GCA001507265.1_ASM150726v1
RM3194	1.73226	30.2894	1791	1818	1655	1767	1732262	1	SAMN04455262	PRJNA310765	GCA_001563565.1	GCA001563565.1_ASM156356v1
OD267	1.82632	30.1814	1944	1961	1801	1912	1826322	2	SAMN04545450	PRJNA314911	GCA_001587015.1	GCA001587015.1_ASM158701v1
WP2202	1.80145	30.281	1901	1908	1775	1857	1801450	1	SAMN04545451	PRJNA314911	GCA_001587035.1	GCA001587035.1_ASM158703v1
RM1285	1.67511	30.5	1751	1712	1641	1661	1675112	0	SAMN04323384	PRJNA305292	GCA_001686905.1	GCA001686905.1_ASM168690v1
14980A	1.75989	30.1453	1817	1825	1681	1774	1759887	1	SAMN05544802	PRJNA338271	GCA_001717625.1	GCA001717625.1_ASM171762v1
MTVDSCj07	1.65271	30.5	1718	1769	1621	1718	1652714	0	SAMN03380191	PRJNA276739	GCA_001721945.1	GCA001721945.1_ASM172194v1
MTVDSCj13	1.68441	30.5	1754	1913	1632	1862	1684409	0	SAMN03380192	PRJNA276739	GCA_001721965.1	GCA001721965.1_ASM172196v1
MTVDSCj16	1.78531	30.3	1882	1716	1734	1665	1785310	0	SAMN03380193	PRJNA276739	GCA_001721985.1	GCA001721985.1_ASM172198v1
RM3420	1.66678	30.6	1743	1729	1644	1681	1666780	0	SAMN05830826	PRJNA206197	GCA_001767215.1	GCA001767215.1_ASM176721v1
BCW_6920	1.63254	30.6	1722	1901	1367	1850	1632543	0	SAMN05913002	PRJNA203445	GCA_001808165.1	GCA001808165.1_ASM180816v1
FJ3124	1.69432	30.6	1794	1776	1654	1724	1694324	0	SAMN05942183	PRJNA350584	GCA_001865395.1	GCA001865395.1_ASM186539v1
TS1218	1.80567	30.269	1891	1938	1735	1887	1805673	1	SAMN05942187	PRJNA350584	GCA_001865415.1	GCA001865415.1_ASM186541v1
IF1100	1.74938	30.1955	1873	1686	1747	1635	1749380	1	SAMN05942179	PRJNA350584	GCA_001865435.1	GCA001865435.1_ASM186543v1
M129	1.80131	30.2691	1893	1720	1763	1669	1801315	1	SAMN02990965	PRJNA209349	GCA_001865595.1	GCA001865595.1_ASM186559v1
D42a	1.72397	30.481	1809	1796	1613	1743	1723973	1	SAMN02990964	PRJNA209346	GCA_001865615.1	GCA001865615.1_ASM186561v1
YQ2210	1.79985	30.0538	1893	1936	1736	1895	1799846	2	SAMN05942186	PRJNA350584	GCA_001870085.1	GCA001870085.1_ASM187008v1
ZP3204	1.81285	30.1516	1905	1944	1744	1895	1812854	2	SAMN05942185	PRJNA350584	GCA_001870105.1	GCA001870105.1_ASM187010v1
HF5-4A-4	1.82152	30.5	1981	1669	1882	1618	1821520	0	SAMN02630630	PRJNA233954	GCA_001951235.1	GCA001951235.1_ASM195123v1
HF5-5-1	1.62948	30.6	1681	1668	1587	1617	1629484	0	SAMN02630631	PRJNA233954	GCA_001951255.1	GCA001951255.1_ASM195125v1
HF5-7-1	1.62949	30.6	1680	1994	1586	1943	1629485	0	SAMN02630632	PRJNA233954	GCA_001951275.1	GCA001951275.1_ASM195127v1
NS4-1-1	1.66996	30.4	1732	1738	1633	1687	1669964	0	SAMN02630633	PRJNA233954	GCA_001951295.1	GCA001951295.1_ASM195129v1
NS4-5-1	1.67533	30.4	1736	1741	1635	1690	1675330	0	SAMN02630634	PRJNA233954	GCA_001951315.1	GCA001951315.1_ASM195131v1
NS4-9-1	1.64445	30.5	1712	1716	1614	1665	1644447	0	SAMN02630635	PRJNA233954	GCA_001951335.1	GCA001951335.1_ASM195133v1
NCTC12662	1.61259	30.7	1659	1661	1548	1610	1612586	0	SAMN06449041	PRJNA376880	GCA_002024325.1	GCA002024325.1_ASM202432v1
ATCC 35925	1.61819	30.6	1661	1706	1548	1654	1618194	0	SAMN06554007	PRJNA378565	GCA_002028305.1	GCA002028305.1_ASM202830v1
YH002	1.82049	30.3697	1951	1945	1831	1894	1820488	1	SAMN06290126	PRJNA369621	GCA_002101355.1	GCA002101355.1_ASM210135v1
FDAARGOS_262	1.76843	30.2	1824	1709	1650	1658	1768428	0	SAMN04875588	PRJNA231221	GCA_002209005.1	GCA002209005.1_ASM220900v1
FDAARGOS_263	1.64147	30.5	1714	1772	1620	1721	1641468	0	SAMN04875589	PRJNA231221	GCA_002209025.1	GCA002209025.1_ASM220902v1
FDAARGOS_265	1.69613	30.4476	1761	1672	1655	1621	1696130	1	SAMN04875591	PRJNA231221	GCA_002209045.1	GCA002209045.1_ASM220904v1
FDAARGOS_266	1.62045	30.6	1673	2029	1579	1978	1620455	0	SAMN04875592	PRJNA231221	GCA_002209065.1	GCA002209065.1_ASM220906v1
FORC_046	1.70975	30.5091	1791	1804	1674	1750	1709747	2	SAMN05411282	PRJNA329382	GCA_002214785.1	GCA002214785.1_ASM221478v1
11168H/lacY	1.64565	30.6	1719	1723	1618	1672	1645651	0	SAMN07357094	PRJNA394649	GCA_002224325.1	GCA002224325.1_ASM222432v1
81-176_G1_B0	1.6203	30.6	1676	1745	1542	1694	1620303	0	SAMN07357174	PRJNA394665	GCA_002224385.1	GCA002224385.1_ASM222438v1
RM1246-ERRC	1.70489	30.5602	1789	1777	1692	1726	1704891	1	SAMN07304762	PRJNA392692	GCA_002234455.1	GCA002234455.1_ASM223445v1
81-176_G1_B7	1.61613	30.6	1671	1887	1473	1836	1616132	0	SAMN07357615	PRJNA394701	GCA_002238355.1	GCA002238355.1_ASM223835v1
11168H/araE	1.6485	30.6	1715	1772	1535	1720	1648502	0	SAMN07357073	PRJNA394645	GCA_002238375.1	GCA002238375.1_ASM223837v1
104	1.55831	30.3	1607	1734	1567	1697	1558306	0	SAMN07602919	PRJNA401331	GCA_002312965.1	GCA002312965.1_ASM231296v1
100	1.8696	30.3	1912	2084	1867	2041	1869602	1	SAMN07629443	PRJNA404064	GCA_002355255.1	GCA002355255.1_ASM235525v1
CFSAN032806	1.78291	30.534	1877	2034	1743	1983	1782911	1	SAMN03580887	PRJNA309864	GCA_002407125.1	GCA002407125.1_ASM240712v1
FDAARGOS_422	1.69036	30.5	1771	1807	1662	1756	1690358	0	SAMN07312466	PRJNA231221	GCA_002587105.1	GCA002587105.1_ASM258710v1
FDAARGOS_421	1.7778	30.3	1887	1787	1757	1736	1777799	0	SAMN07312465	PRJNA231221	GCA_002587225.1	GCA002587225.1_ASM258722v1
FDAARGOS_295	1.84505	30.6	1970	1924	1720	1873	1845051	0	SAMN06173308	PRJNA231221	GCA_002983725.1	GCA002983725.1_ASM298372v1
CFSAN054107	1.89851	30.1596	1999	1742	1838	1691	1898513	1	SAMN08663442	PRJNA243331	GCA_003030185.1	GCA003030185.1_ASM303018v1
12567	1.70569	30.4	1774	1789	1673	1738	1705686	0	SAMN08849677	PRJNA448558	GCA_003060725.1	GCA003060725.1_ASM306072v1
NCTC 12660	1.68404	30.5	1756	1761	1658	1710	1684042	0	SAMN08849631	PRJNA448559	GCA_003060745.1	GCA003060745.1_ASM306074v1
NCTC 12661	1.6144	30.6	1656	1660	1551	1609	1614396	0	SAMN08849650	PRJNA448560	GCA_003060765.1	GCA003060765.1_ASM306076v1
NCTC 12664	1.63423	30.5	1694	1697	1599	1646	1634231	0	SAMN08849636	PRJNA448562	GCA_003060785.1	GCA003060785.1_ASM306078v1
CJ067CC45	1.72712	30.2	1823	1881	1720	1838	1727122	0	SAMN05831970	PRJNA344714	GCA_003368045.1	GCA003368045.1_ASM336804v1
CJ515CC45	1.65258	30.4	1741	1823	1645	1780	1652581	0	SAMN05831978	PRJNA344714	GCA_003368065.1	GCA003368065.1_ASM336806v1
CJ031CC45	1.63429	30.5	1723	1733	1623	1690	1634294	0	SAMN05831969	PRJNA344714	GCA_003368085.1	GCA003368085.1_ASM336808v1
CJ017CCUA	1.68109	30.2	1772	1958	1636	1915	1681088	0	SAMN05831994	PRJNA344714	GCA_003368105.1	GCA003368105.1_ASM336810v1
CJ513CC45	1.61403	30.5	1685	1730	1595	1687	1614027	0	SAMN05831976	PRJNA344714	GCA_003368125.1	GCA003368125.1_ASM336812v1
CJ088CC52	1.60571	30.5	1674	1647	1555	1604	1605714	0	SAMN05831983	PRJNA344714	GCA_003368145.1	GCA003368145.1_ASM336814v1
CJ074CC443	1.69298	30.3	1764	1690	1627	1647	1692979	0	SAMN05831985	PRJNA344714	GCA_003368165.1	GCA003368165.1_ASM336816v1
CJ071CC464	1.74757	30.2	1851	1802	1677	1755	1747565	0	SAMN05831988	PRJNA344714	GCA_003368185.1	GCA003368185.1_ASM336818v1
CJ090CC1332	1.56723	30.4	1638	1679	1516	1636	1567232	0	SAMN05831990	PRJNA344714	GCA_003368205.1	GCA003368205.1_ASM336820v1
CJ018CCUA	1.79373	30.1	1926	1716	1747	1673	1793733	0	SAMN05831991	PRJNA344714	GCA_003368225.1	GCA003368225.1_ASM336822v1
CJ066CC508	1.65844	30.4	1713	1825	1604	1782	1658441	0	SAMN05831989	PRJNA344714	GCA_003368245.1	GCA003368245.1_ASM336824v1
HPC5	1.79517	30.4	1943	1935	1780	1884	1795167	0	SAMN10034081	PRJNA490342	GCA_003574945.1	GCA003574945.1_ASM357494v1
CLB104	1.75432	30.4	1855	1868	1724	1817	1754322	0	SAMN10536214	PRJNA509051	GCA_003950275.1	GCA003950275.1_ASM395027v1
huA17	1.81782	30.134	1911	1751	1787	1700	1817819	1	SAMN08687180	PRJNA437928	GCA_003971585.1	GCA003971585.1_ASM397158v1
ATCC 33560	1.78292	30.2	1836	1665	1661	1614	1782924	0	SAMN06339750	PRJNA374478	GCA_003999645.1	GCA003999645.1_ASM399964v1
FORC_083	1.67313	30.8149	1747	1984	1609	1933	1673126	2	SAMN08637757	PRJNA437040	GCA_004328905.1	GCA004328905.1_ASM432890v1
BC	1.60851	30.6	1680	1928	1543	1877	1608510	0	SAMN10101901	PRJNA492384	GCA_004924295.1	GCA004924295.1_ASM492429v1
YH003	1.74398	30.3	1813	1867	1663	1816	1743985	0	SAMN12249490	PRJNA553752	GCA_007107025.1	GCA007107025.1_ASM710702v1
NCTC11925	1.72887	30.6	1788	1833	1544	1782	1728869	0	SAMEA3443779	PRJEB6403	GCA_900474415.1	GCA900474415.1_39111_H02
NCTC11168	1.64146	30.5	1716	1715	1619	1664	1641464	0	SAMEA3672890	PRJEB6403	GCA_900475265.1	GCA900475265.1_43024_F01
NCTC11951	1.89123	30.7	2115	2113	2061	2062	1891235	0	SAMEA4362433	PRJEB6403	GCA_900637255.1	GCA900637255.1_50377_B01
NCTC13268	1.80139	30.3	1864	1924	1689	1873	1801392	0	SAMEA104167179	PRJEB6403	GCA_900638165.1	GCA900638165.1_56527_E01
NCTC13266	1.66466	30.6	1738	1739	1615	1687	1664663	0	SAMEA104167178	PRJEB6403	GCA_900638175.1	GCA900638175.1_56527_F01
NCTC13265	1.82283	30.2	1948	1984	1808	1933	1822834	0	SAMEA104167180	PRJEB6403	GCA_900638185.1	GCA900638185.1_56527_G01
NCTC13261	1.66667	30.4	1753	1775	1631	1724	1666666	0	SAMEA104167187	PRJEB6403	GCA_900638195.1	GCA900638195.1_56553_F01
NCTC13255	1.66686	30.6	1740	1740	1640	1688	1666864	0	SAMEA104167185	PRJEB6403	GCA_900638205.1	GCA900638205.1_56553_D01
NCTC13257	1.63403	30.5	1684	1692	1585	1641	1634025	0	SAMEA104167186	PRJEB6403	GCA_900638225.1	GCA900638225.1_56553_E01
NCTC12109	1.65315	30.6	1710	1723	1606	1672	1653145	0	SAMEA104167192	PRJEB6403	GCA_900638235.1	GCA900638235.1_56772_E02
NCTC12851	1.63456	30.5	1685	1711	1554	1660	1634561	0	SAMEA104167203	PRJEB6403	GCA_900638285.1	GCA900638285.1_57043_B01
NCTC10983	1.6413	30.5	1711	1714	1610	1663	1641302	0	SAMEA104210759	PRJEB6403	GCA_900638365.1	GCA900638365.1_57428_D01
NCTC11924	1.76223	30.5	1900	1898	1846	1847	1762226	0	SAMEA104307714	PRJEB6403	GCA_900638625.1	GCA900638625.1_58635_B02
Removed strain
Strain name	Size (Mb)	GC%	NCBI Genes	NCBI Proteins	BioSample	BioProject	Assembly		Assembly_version
414	1.71012	29.5986	3680	3600	SAMN02471183	PRJNA33821	GCA_000163995.1		GCA_000163995.1_ASM16399v1
*After being annotated by the software Prokka
